# Supplementary material for: Predictors of next-generation sequencing panel selection using a shared decision-making approach
Source: PubMed Central journal article supplement (PMC5923203; doi:10.1038/s41525-018-0050-y), 2018-04-27
Supplement: 41525_2018_50_MOESM1_ESM.pdf [file 41525_2018_50_MOESM1_ESM.pdf]

**SUPPLEMENTARY TABLES**

**Supplementary Table 1.** NGS panels classified as BCPs

| Laboratory 1 |              |              | Laboratory 2 |              |
|--------------|--------------|--------------|--------------|--------------|
| BCP 1        | BCP 2        | BCP 3        | BCP 4        | BCP 5        |
| <i>BRCA1</i> | <i>ATM</i>   | <i>ATM</i>   | <i>ATM</i>   | <i>ATM</i>   |
| <i>BRCA2</i> | <i>BRCA1</i> | <i>BRCA1</i> | <i>BRCA1</i> | <i>BRCA1</i> |
| <i>CDH1</i>  | <i>BRCA2</i> | <i>BRCA2</i> | <i>BRCA2</i> | <i>BRCA2</i> |
| <i>PALB2</i> | <i>CDH1</i>  | <i>CDH1</i>  | <i>CDH1</i>  | <i>CDH1</i>  |
| <i>PTEN</i>  | <i>CHEK2</i> | <i>CHEK2</i> | <i>CHEK2</i> | <i>CHEK2</i> |
| <i>STK11</i> | <i>PALB2</i> | <i>NBN</i>   | <i>PALB2</i> | <i>NBN</i>   |
| <i>TP53</i>  | <i>PTEN</i>  | <i>NF1</i>   | <i>PTEN</i>  | <i>PALB2</i> |
|              | <i>STK11</i> | <i>PALB2</i> | <i>TP53</i>  | <i>PTEN</i>  |
|              | <i>TP53</i>  | <i>PTEN</i>  |              | <i>TP53</i>  |
|              |              | <i>STK11</i> |              |              |
|              |              | <i>TP53</i>  |              |              |

Abbreviation: BCP, breast cancer panel

**Supplementary Table 2.** NGS panels classified as MCPs

| Laboratory 1  |               |               |               |                                   | Laboratory 2  |               |               | Laboratory 3  |
|---------------|---------------|---------------|---------------|-----------------------------------|---------------|---------------|---------------|---------------|
| MCP 1         | MCP 2         | MCP 3         | MCP 4         | MCP 5 <sup>1</sup><br>(Add-on FA) | MCP 6         | MCP 7         | MCP 8         | MCP 9         |
| <i>ATM</i>    | <i>ATM</i>    | <i>APC</i>    | <i>ALK</i>    | <i>BRCA2</i>                      | <i>ATM</i>    | <i>APC</i>    | <i>APC</i>    | <i>ATM</i>    |
| <i>BRCA1</i>  | <i>BARD1</i>  | <i>ATM</i>    | <i>APC</i>    | <i>BRIP1</i>                      | <i>BARD1</i>  | <i>ATM</i>    | <i>ATM</i>    | <i>BRCA1</i>  |
| <i>BRCA2</i>  | <i>BRCA1</i>  | <i>AXIN2</i>  | <i>ATM</i>    | <i>ERCC4</i>                      | <i>BRCA1</i>  | <i>BMPR1A</i> | <i>AXIN2</i>  | <i>BRCA2</i>  |
| <i>BRIP1</i>  | <i>BRCA2</i>  | <i>BARD1</i>  | <i>AXIN2</i>  | <i>FANCA</i>                      | <i>BRCA2</i>  | <i>BRCA1</i>  | <i>BARD1</i>  | <i>BRIP1</i>  |
| <i>CDH1</i>   | <i>BRIP1</i>  | <i>BMPR1A</i> | <i>BAP1</i>   | <i>FANCB</i>                      | <i>BRIP1</i>  | <i>BRCA2</i>  | <i>BMPR1A</i> | <i>CDH1</i>   |
| <i>CHEK2</i>  | <i>CDH1</i>   | <i>BRCA1</i>  | <i>BARD1</i>  | <i>FANCC</i>                      | <i>CDH1</i>   | <i>BRIP1</i>  | <i>BRCA1</i>  | <i>CHEK2</i>  |
| <i>EPCAM</i>  | <i>CHEK2</i>  | <i>BRCA2</i>  | <i>BLM</i>    | <i>FANCD2</i>                     | <i>CHEK2</i>  | <i>CDH1</i>   | <i>BRCA2</i>  | <i>EPCAM</i>  |
| <i>MLH1</i>   | <i>EPCAM</i>  | <i>BRIP1</i>  | <i>BMPR1A</i> | <i>FANCE</i>                      | <i>EPCAM</i>  | <i>CDKN2A</i> | <i>BRIP1</i>  | <i>MLH1</i>   |
| <i>MSH2</i>   | <i>FANCC</i>  | <i>CDH1</i>   | <i>BRCA1</i>  | <i>FANCF</i>                      | <i>FANCC</i>  | <i>CHEK2</i>  | <i>CDH1</i>   | <i>MSH2</i>   |
| <i>MSH6</i>   | <i>MLH1</i>   | <i>CDKN2A</i> | <i>BRCA2</i>  | <i>FANCG</i>                      | <i>MLH1</i>   | <i>EPCAM</i>  | <i>CDK4</i>   | <i>MSH6</i>   |
| <i>NBN</i>    | <i>MRE11A</i> | <i>CHEK2</i>  | <i>BRIP1</i>  | <i>FANCI</i>                      | <i>MSH2</i>   | <i>MLH1</i>   | <i>CDKN2A</i> | <i>NBN</i>    |
| <i>NF1</i>    | <i>MSH2</i>   | <i>DICER1</i> | <i>CASR</i>   | <i>FANCL</i>                      | <i>MSH6</i>   | <i>MSH2</i>   | <i>CHEK2</i>  | <i>NF1</i>    |
| <i>PALB2</i>  | <i>MSH6</i>   | <i>EPCAM</i>  | <i>CDC73</i>  | <i>FANCM</i>                      | <i>NBN</i>    | <i>MSH6</i>   | <i>EPCAM</i>  | <i>PALB2</i>  |
| <i>PMS2</i>   | <i>NBN</i>    | <i>GREM1</i>  | <i>CDH1</i>   | <i>PALB2</i>                      | <i>PALB2</i>  | <i>MUTYH</i>  | <i>FANCC</i>  | <i>PMS2</i>   |
| <i>PTEN</i>   | <i>NF1</i>    | <i>KIT</i>    | <i>CDK4</i>   | <i>RAD51C</i>                     | <i>PMS2</i>   | <i>PALB2</i>  | <i>GREM1</i>  | <i>PTEN</i>   |
| <i>RAD51C</i> | <i>PALB2</i>  | <i>MEN1</i>   | <i>CDKN1B</i> | <i>SLX4</i>                       | <i>PTEN</i>   | <i>PMS2</i>   | <i>MLH1</i>   | <i>RAD51C</i> |
| <i>RAD51D</i> | <i>PMS2</i>   | <i>MLH1</i>   | <i>CDKN1C</i> | <i>XRCC2</i>                      | <i>RAD51C</i> | <i>PTEN</i>   | <i>MSH2</i>   | <i>RAD51D</i> |
| <i>STK11</i>  | <i>PTEN</i>   | <i>MSH2</i>   | <i>CDKN2A</i> |                                   | <i>RAD51D</i> | <i>RAD51C</i> | <i>MSH6</i>   | <i>STK11</i>  |
| <i>TP53</i>   | <i>RAD50</i>  | <i>MSH6</i>   | <i>CEBPA</i>  |                                   | <i>TP53</i>   | <i>RAD51D</i> | <i>MUTYH</i>  | <i>TP53</i>   |
|               | <i>RAD51C</i> | <i>MUTYH</i>  | <i>CHEK2</i>  |                                   | <i>XRCC2</i>  | <i>SMAD4</i>  | <i>NBN</i>    |               |
|               | <i>RAD51D</i> | <i>NBN</i>    | <i>DICER1</i> |                                   |               | <i>STK11</i>  | <i>PALB2</i>  |               |
|               | <i>STK11</i>  | <i>NF1</i>    | <i>DIS3L2</i> |                                   |               | <i>TP53</i>   | <i>PMS2</i>   |               |
|               | <i>TP53</i>   | <i>PALB2</i>  | <i>EGFR</i>   |                                   |               | <i>VHL</i>    | <i>POLD1</i>  |               |
|               |               | <i>PDGFRA</i> | <i>EPCAM</i>  |                                   |               |               | <i>POLE</i>   |               |
|               |               | <i>PMS2</i>   | <i>FH</i>     |                                   |               |               | <i>PTEN</i>   |               |
|               |               | <i>POLD1</i>  | <i>FLCN</i>   |                                   |               |               | <i>RAD51C</i> |               |
|               |               | <i>POLE</i>   | <i>GATA2</i>  |                                   |               |               | <i>RAD51D</i> |               |

|                                                                                                                                                                                                                                        |                                                                                                                                                                                                                                                                                                                                                                                                                                                                                                           |                                                                           |
|----------------------------------------------------------------------------------------------------------------------------------------------------------------------------------------------------------------------------------------|-----------------------------------------------------------------------------------------------------------------------------------------------------------------------------------------------------------------------------------------------------------------------------------------------------------------------------------------------------------------------------------------------------------------------------------------------------------------------------------------------------------|---------------------------------------------------------------------------|
| <i>PTEN</i><br><i>RAD50</i><br><i>RAD51C</i><br><i>RAD51D</i><br><i>SDHA</i><br><i>SDHB</i><br><i>SDHC</i><br><i>SDHD</i><br><i>SMAD4</i><br><i>SMARCA4</i><br><i>STK11</i><br><i>TP53</i><br><i>TSC1</i><br><i>TSC2</i><br><i>VHL</i> | <i>GPC3</i><br><i>GREM1</i><br><i>HOXB13</i><br><i>HRAS</i><br><i>KIT</i><br><i>MAX</i><br><i>MEN1</i><br><i>MET</i><br><i>MITF</i><br><i>MLH1</i><br><i>MSH2</i><br><i>MSH6</i><br><i>MUTYH</i><br><i>NBN</i><br><i>NF1</i><br><i>NF2</i><br><i>PALB2</i><br><i>PDGFRA</i><br><i>PHOX2B</i><br><i>PMS2</i><br><i>POLD1</i><br><i>POLE</i><br><i>POT1</i><br><i>PRKARIA</i><br><i>PTCH1</i><br><i>PTEN</i><br><i>RAD50</i><br><i>RAD51C</i><br><i>RAD51D</i><br><i>RB1</i><br><i>RECQL4</i><br><i>RET</i> | <i>SMAD4</i><br><i>STK11</i><br><i>TP53</i><br><i>VHL</i><br><i>XRCC2</i> |
|----------------------------------------------------------------------------------------------------------------------------------------------------------------------------------------------------------------------------------------|-----------------------------------------------------------------------------------------------------------------------------------------------------------------------------------------------------------------------------------------------------------------------------------------------------------------------------------------------------------------------------------------------------------------------------------------------------------------------------------------------------------|---------------------------------------------------------------------------|

|                                                                                                                                                                                                                                                                                                                                       |  |  |
|---------------------------------------------------------------------------------------------------------------------------------------------------------------------------------------------------------------------------------------------------------------------------------------------------------------------------------------|--|--|
| <i>RUNX1</i><br><i>SDHA</i><br><i>SDHAF2</i><br><i>SDHB</i><br><i>SDHC</i><br><i>SDHD</i><br><i>SMAD4</i><br><i>SMARCA4</i><br><i>SMARCB1</i><br><i>SMARCE1</i><br><i>STK11</i><br><i>SUFU</i><br><i>TERC</i><br><i>TERT</i><br><i>TMEM127</i><br><i>TP53</i><br><i>TSC1</i><br><i>TSC2</i><br><i>VHL</i><br><i>WRN</i><br><i>WT1</i> |  |  |
|---------------------------------------------------------------------------------------------------------------------------------------------------------------------------------------------------------------------------------------------------------------------------------------------------------------------------------------|--|--|

<sup>1</sup>MCP 5 is an 'add-on' panel that is selected in addition to MCP 1-4.  
Abbreviation: MCP, multi-cancer panel.

**Supplementary Table 3.** NGS panel selection when divided into three categories, per personal cancer history

|                                  | Breast cancer only |       | Ovarian cancer only |       | Breast and ovarian cancer |       |
|----------------------------------|--------------------|-------|---------------------|-------|---------------------------|-------|
|                                  | n                  | %     | n                   | %     | n                         | %     |
| NGS panel                        |                    |       |                     |       |                           |       |
| Breast cancer panel <sup>1</sup> | 45                 | 26.0  | 2                   | 2.8   | 2                         | 10.0  |
| Br/Gyn cancer panel <sup>2</sup> | 75                 | 43.4  | 31                  | 43.0  | 9                         | 45.0  |
| Multi-cancer panel <sup>3</sup>  | 53                 | 30.6  | 39                  | 54.2  | 9                         | 45.0  |
| Total                            | 173                | 100.0 | 72                  | 100.0 | 20                        | 100.0 |

<sup>1</sup> All panels classified as BCP (see Supp. Table 1)

<sup>2</sup> MCP1, MCP2, MCP6, MCP9 (see Supp. Table 2)

<sup>3</sup> MCP3, MCP4, MCP7, MCP8 (see Supp. Table 2)

Abbreviation: Br/Gyn, breast and gynaecological cancer panel.
